# Supplementary material for: A Systematic Review of Pharmacovigilance Systems in Developing Countries Using the WHO Pharmacovigilance Indicators
Source: PubMed Central journal article supplement (PMC9356965; doi:10.1007/s43441-022-00415-y), 2022-06-03
Supplement: 43441_2022_415_MOESM2_ESM.pdf [file 43441_2022_415_MOESM2_ESM.pdf]

# A systematic review of pharmacovigilance systems in developing countries using the WHO pharmacovigilance indicators

Hamza Y. Garashi, Douglas T. Steinke, Ellen I. Schafheutle

Correspondence: [hamza.garashi@postgrad.manchester.ac.uk](mailto:hamza.garashi@postgrad.manchester.ac.uk)

Division of Pharmacy and Optometry, School of Health Sciences, Faculty of Biology, Medicine and Health, The University of Manchester, Manchester M13 9PT, UK

## Pharmacovigilance System Implementation Evaluation Search Strategy

### Ovid MEDLINE(R) <1946 to July Week 2 2021>

| #  | Search Term                                           | Number of Results |
|----|-------------------------------------------------------|-------------------|
| 1  | Pharmacovigilance/                                    | 2435              |
| 2  | Adverse Drug Reaction Reporting Systems/              | 7982              |
| 3  | Product Surveillance, Postmarketing/                  | 7355              |
| 4  | Evaluation Studies as Topic/                          | 122298            |
| 5  | Program Evaluation/                                   | 65198             |
| 6  | Benchmarking/                                         | 14389             |
| 7  | Outcome Assessment, Health Care/                      | 76695             |
| 8  | Process Assessment, Health Care/                      | 4879              |
| 9  | "Outcome and Process Assessment, Health Care"/        | 28091             |
| 10 | monitor*.mp.                                          | 907041            |
| 11 | 1 or 2 or 3                                           | 15886             |
| 12 | 4 or 5 or 6 or 7 or 8 or 9 or 10                      | 1193601           |
| 13 | 11 and 12                                             | 3265              |
| 14 | limit 14 to (english language and yr="2012 -Current") | 1231              |

### Embase <1974 to 2021 July 16>

| #  | Search Term                                           | Number of Results |
|----|-------------------------------------------------------|-------------------|
| 1  | Pharmacovigilance/                                    | 2457              |
| 2  | drug surveillance program/                            | 26286             |
| 3  | postmarketing surveillance/                           | 11672             |
| 4  | evaluation study/                                     | 49798             |
| 5  | program evaluation/                                   | 16604             |
| 6  | evaluation research/                                  | 2057              |
| 7  | benchmarking/                                         | 6728              |
| 8  | monitoring/                                           | 169687            |
| 9  | outcome assessment/                                   | 600140            |
| 10 | 1 or 2 or 3                                           | 39215             |
| 11 | 4 or 5 or 6 or 7 or 8 or 9                            | 838370            |
| 12 | 10 and 11                                             | 3166              |
| 13 | limit 12 to (english language and yr="2012 -Current") | 2407              |

## Web of Science

| Search Terms                                                                                                                                                                                                                                                                                                                     | Results    |
|----------------------------------------------------------------------------------------------------------------------------------------------------------------------------------------------------------------------------------------------------------------------------------------------------------------------------------|------------|
| ALL=(pharmacovigilance OR "Postmarketing surveillance" OR "Drug surveillance program" OR "adverse drug reaction reporting systems")                                                                                                                                                                                              | 21,692     |
| ALL=(Evaluat* OR Monitor* OR Assess* OR Benchmark*)                                                                                                                                                                                                                                                                              | 11,055,069 |
| ALL=(pharmacovigilance OR "Postmarketing surveillance" OR "Drug surveillance program" OR "adverse drug reaction reporting systems") AND ALL=(Evaluat* OR Monitor* OR Assess* OR Benchmark*)                                                                                                                                      | 8,595      |
| (ALL=(pharmacovigilance OR "Postmarketing surveillance" OR "Drug surveillance program" OR "adverse drug reaction reporting systems") AND ALL=(Evaluat* OR Monitor* OR Assess* OR Benchmark*)) AND (PY==( "2012" OR "2013" OR "2014" OR "2015" OR "2016" OR "2017" OR "2018" OR "2019" OR "2020" OR "2021"))                      | 5,918      |
| (ALL=(pharmacovigilance OR "Postmarketing surveillance" OR "Drug surveillance program" OR "adverse drug reaction reporting systems") AND ALL=(Evaluat* OR Monitor* OR Assess* OR Benchmark*)) AND (PY==( "2012" OR "2013" OR "2014" OR "2015" OR "2016" OR "2017" OR "2018" OR "2019" OR "2020" OR "2021")) AND LA==( "ENGLISH") | 5,663      |

## CINAHL Plus

| Search ID# | Search Terms                                                                                         | Actions |
|------------|------------------------------------------------------------------------------------------------------|---------|
| S14        | S10 AND S11<br><b>Limiters</b> - Publication Year: 2012-2021<br><b>Narrow by Language:</b> - english | 1,441   |
| S13        | S10 AND S11<br><b>Narrow by Language:</b> - english                                                  | 2,394   |
| S12        | S10 AND S11                                                                                          | 2,427   |
| S11        | S4 OR S5 OR S6 OR S7 OR S8 OR S9                                                                     | 564,727 |
| S10        | S1 OR S2 OR S3                                                                                       | 14,642  |
| S9         | "monitor*"                                                                                           | 193,652 |
| S8         | (MH "Process Assessment (Health Care)")                                                              | 4,816   |
| S7         | (MH "Outcome Assessment")                                                                            | 46,123  |
| S6         | (MH "Benchmarking")                                                                                  | 7,620   |
| S5         | (MH "Evaluation Research")                                                                           | 300,110 |
| S4         | (MH "Program Evaluation")                                                                            | 43,963  |
| S3         | "adverse drug reaction reporting systems"                                                            | 7,053   |
| S2         | (MH "Drug Evaluation")                                                                               | 6,907   |
| S1         | (MH "Pharmacovigilance")                                                                             | 1,356   |
